# Supplementary material for: Diet of a rare herbivore based on DNA metabarcoding of feces: Selection, seasonality, and survival
Source: PubMed Central journal article supplement (PMC7391308; doi:10.1002/ece3.6488), 2020-06-30

Difference in Frequency

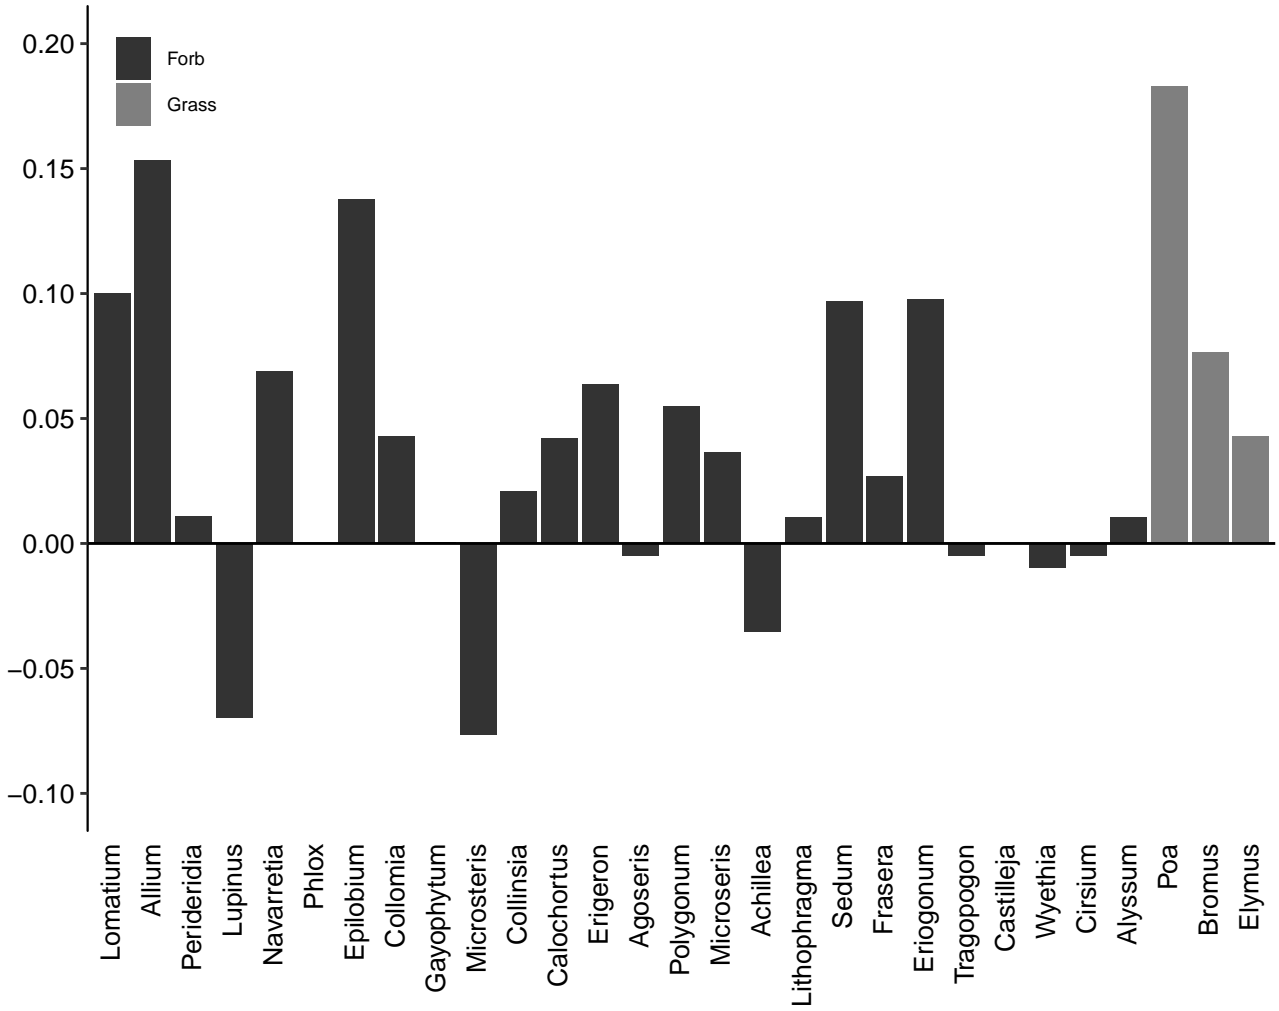

Supplement: ECE3-10-7627-s001.pdf [file ECE3-10-7627-s001.pdf]
